# Supplementary material
Source: MDPI journal article supplement (https://www.mdpi.com/search?q=sensors-16-00096)
Supplement: s001 [file sensors-16-00096-s001.pdf]

# **Supplementary Material: Use of Piezoelectric Immunosensors for Detection of Interferon-Gamma Interaction with Specific Antibodies in the Presence of Released-Active Forms of Antibodies to Interferon-Gamma**

Elena Don, Olga Farafonova, Suzanna Pokhil, Darya Barykina <sup>1</sup>, Marina Nikiforova, Darya Shulga, Alena Borshcheva, Sergey Tarasov, Tatyana Ermolaeva and Oleg Epstein

**Table S1.** Studies of the affinity of biolayer coating obtained using various preparation methods for different Abs concentrations.

| Parameter                     | Method 1         | Method 2           | Method 3           | Method 4         |                 |                    | Method 5         |                 |
|-------------------------------|------------------|--------------------|--------------------|------------------|-----------------|--------------------|------------------|-----------------|
|                               |                  |                    |                    | MU + AMT         | MU + OMBP       | MU + MPT           | GA               | Calix[4]rene    |
| undiluted Abs to IFNg         |                  |                    |                    |                  |                 |                    |                  |                 |
| f <sub>i</sub>                | 9310307          | 9725769            | 9487605            | 9858925          | 10005262        | 9985632            | 9535614          |                 |
| f (mean, n = 5) ± SD          | 9309630 ± 192.5  | 9723476 ± 140400.8 | 9485924 ± 124989.8 | 9858307 ± 225.1  |                 |                    | 9534996 ± 310574 |                 |
| Δf                            | 676.6            | 2293.4             | 1681.2             | 618.4            |                 |                    | 617.6            | –               |
| M                             | 832.218          | 2820.882           | 2067.876           | 760.632          | –               | Sensor overloading | 759.648          |                 |
|                               | 155.618          | 527.482            | 386.676            | 142.232          |                 |                    | 142.048          |                 |
| N                             | 2                | 1                  | 3                  | 9                |                 |                    | 5                | –               |
| A                             | 10149            | 34401              | 25218              | 9276             |                 |                    | 9264             |                 |
| Abs to IFNg diluted two-fold  |                  |                    |                    |                  |                 |                    |                  |                 |
| f <sub>i</sub>                | 9079825          | 9167912            | 9238957            |                  | 9985126         | 10051563           | 8771563          |                 |
| f (mean, n = 5) ± SD          | 9079217 ± 130567 | 9166859 ± 311177.5 | 9238592 ± 412577.2 |                  | 9985034 ± 23192 | 10031111 ± 313035  | 8770837 ± 71454  |                 |
| Δf                            | 607.8            | 1053.4             | 365.4              |                  | 91.6            | 20451.6            | 726.4            |                 |
| M                             | 747.594          | 1295.682           | 449.442            | –                | 112.668         | 25155.47           | 893.472          | –               |
| H                             | 139.794          | 242.282            | 84.042             |                  | 21.068          | 4703.868           | 167.072          |                 |
| N                             | 6                | 7                  | 20                 |                  | 5               | 4                  | 16               |                 |
| A                             | 9117             | 15801              | 5481               |                  | 1374            | 306774             | 10896            |                 |
| Abs to IFNg diluted four-fold |                  |                    |                    |                  |                 |                    |                  |                 |
| f <sub>i</sub>                | 9228963          | 9013968            | 9400487            | 9850064          |                 |                    | 8902896          | 9888215         |
| f (mean, n = 5) ± SD          | 9228734 ± 45222  | 9013371 ± 405605   | 9400239 ± 321144   | 9849175 ± 156917 |                 |                    | 8902760 ± 215630 | 9888118 ± 83486 |
| Δf                            | 228.8            | 596.8              | 248                | 888.6            |                 |                    | 135.8            | 97.2            |
| M                             | 281.424          | 734.064            | 305.04             | 1092.978         | –               | –                  | 167.034          | 119.556         |
| H                             | 52.624           | 137.264            | 57.04              | 204.378          |                 |                    | 31.234           | 22.356          |
| N                             | 12               | 5                  | 21                 | 21               |                 |                    | 18               | 11              |
| A                             | 3432             | 8952               | 3720               | 13329            |                 |                    | 2037             | 1458            |

Annotation for Supplementary Table S1. Δf—oscillation frequency of the sensor following Abs-IFNg binding (Hz); f (mean)—mean oscillation frequency from 5 replicate tests (Hz); f<sub>i</sub>—oscillation frequency of the sensor before contact with IFNg (Hz); m—mass of bioreceptor layer (ng) prepared using methods 1–5; h—bioreceptor layer thickness (nm); N—number of measurement runs where the analytical signal was not decreased by more than 5%; A—concentration sensitivity (A. Hz·mL·ng<sup>-1</sup>) reflecting variations in oscillation frequency of the immunosensor upon contact with IFNg.

**Table S2.** Effects of different chaotropic agents on the number of measurement runs N (MU used for receptor layer coating).

| Chaotropic Agent            | <i>n</i> |
|-----------------------------|----------|
| Potassium rhodanide         | 21       |
| Hydroxylamine hydrochloride | 20–21    |
| Urea                        | 8        |
| Phenol                      | 6        |
| Diethylamine hydrochloride  | 20–21    |
| Magnesium chloride          | 15       |
| Bidistilled water           | –        |

**Table S3.** Repeatability evaluation of net signal measurements for target samples *vs.* reference solution full data.

| Analytical Signal of Sensor         | Number of Experiment | Sample <i>vs.</i> IFNg Ratio |             |             |              |              |             |
|-------------------------------------|----------------------|------------------------------|-------------|-------------|--------------|--------------|-------------|
|                                     |                      | 1:1                          | 1:2         | 1:4         | 1:6          | 2:1          | 4:1         |
| RAF of Abs to IFNg (liquid samples) |                      |                              |             |             |              |              |             |
| $\Delta f$                          | 1                    | 252                          | 308         | 405         | 441          | 189          | 125         |
|                                     | 2                    | 248                          | 305         | 402         | 425          | 196          | 126         |
|                                     | 3                    | 241                          | 307         | 395         | 439          | 191          | 120         |
|                                     | 4                    | 260                          | 303         | 408         | 436          | 205          | 131         |
|                                     | 5                    | 252                          | 311         | 405         | 452          | 192          | 118         |
|                                     | average $\pm \delta$ | 251 $\pm$ 9                  | 307 $\pm$ 4 | 403 $\pm$ 6 | 439 $\pm$ 12 | 195 $\pm$ 8  | 124 $\pm$ 6 |
|                                     | s                    | 252                          | 308         | 405         | 441          | 189          | 125         |
| Placebo (liquid samples)            |                      |                              |             |             |              |              |             |
| $\Delta f$                          | 1                    | 295                          | 363         | 412         | 445          | 223          | 167         |
|                                     | 2                    | 289                          | 358         | 425         | 451          | 225          | 168         |
|                                     | 3                    | 287                          | 367         | 421         | 448          | 218          | 165         |
|                                     | 4                    | 298                          | 364         | 417         | 462          | 219          | 162         |
|                                     | 5                    | 292                          | 359         | 419         | 448          | 214          | 161         |
|                                     | average $\pm \delta$ | 292 $\pm$ 6                  | 362 $\pm$ 5 | 419 $\pm$ 6 | 451 $\pm$ 8  | 220 $\pm$ 5  | 165 $\pm$ 4 |
|                                     | s                    | 4                            | 4           | 5           | 7            | 4            | 3           |
| RAF of Abs to IFNg (tablets)        |                      |                              |             |             |              |              |             |
| $\Delta f$                          | 1                    | 245                          | 295         | 389         | 436          | 215          | 112         |
|                                     | 2                    | 251                          | 298         | 385         | 425          | 218          | 109         |
|                                     | 3                    | 256                          | 289         | 392         | 419          | 209          | 118         |
|                                     | 4                    | 239                          | 291         | 378         | 426          | 225          | 121         |
|                                     | 5                    | 254                          | 296         | 396         | 429          | 218          | 108         |
|                                     | average $\pm \delta$ | 249 $\pm$ 9                  | 294 $\pm$ 5 | 388 $\pm$ 9 | 427 $\pm$ 8  | 217 $\pm$ 7  | 114 $\pm$ 7 |
|                                     | s                    | 7                            | 4           | 7           | 6            | 6            | 6           |
| Placebo (tablets)                   |                      |                              |             |             |              |              |             |
| $\Delta f$                          | 1                    | 302                          | 401         | 426         | 458          | 230          | 189         |
|                                     | 2                    | 306                          | 412         | 435         | 479          | 235          | 196         |
|                                     | 3                    | 315                          | 413         | 431         | 465          | 231          | 193         |
|                                     | 4                    | 309                          | 405         | 429         | 481          | 227          | 187         |
|                                     | 5                    | 307                          | 408         | 418         | 459          | 209          | 185         |
|                                     | average $\pm \delta$ | 308 $\pm$ 6                  | 408 $\pm$ 6 | 428 $\pm$ 8 | 468 $\pm$ 14 | 226 $\pm$ 13 | 190 $\pm$ 6 |
|                                     | s                    | 5                            | 5           | 6           | 11           | 10           | 4           |

Table S3. Cont.

| Analytical Signal of Sensor          | Number of Experiment | Sample vs. IFNg Ratio |              |              |              |              |              |
|--------------------------------------|----------------------|-----------------------|--------------|--------------|--------------|--------------|--------------|
|                                      |                      | 1:1                   | 1:2          | 1:4          | 1:6          | 2:1          | 4:1          |
| RAF of Abs to IFNg (lactose powders) |                      |                       |              |              |              |              |              |
| $\Delta f$                           | 1                    | 215                   | 286          | 379          | 445          | 178          | 95           |
|                                      | 2                    | 202                   | 276          | 382          | 439          | 165          | 109          |
|                                      | 3                    | 218                   | 282          | 359          | 421          | 159          | 112          |
|                                      | 4                    | 221                   | 286          | 387          | 452          | 176          | 125          |
|                                      | 5                    | 204                   | 274          | 386          | 461          | 156          | 106          |
|                                      | average $\pm \delta$ | $212 \pm 11$          | $281 \pm 7$  | $379 \pm 14$ | $444 \pm 19$ | $167 \pm 12$ | $109 \pm 13$ |
|                                      | s                    | 9                     | 6            | 11           | 15           | 10           | 11           |
| Placebo (lactose powders)            |                      |                       |              |              |              |              |              |
| $\Delta f$                           | 1                    | 287                   | 360          | 402          | 456          | 205          | 142          |
|                                      | 2                    | 279                   | 351          | 425          | 459          | 211          | 153          |
|                                      | 3                    | 285                   | 362          | 409          | 438          | 198          | 149          |
|                                      | 4                    | 290                   | 378          | 387          | 432          | 204          | 143          |
|                                      | 5                    | 286                   | 359          | 401          | 459          | 209          | 148          |
|                                      | average $\pm \delta$ | $285 \pm 5$           | $362 \pm 12$ | $405 \pm 17$ | $449 \pm 16$ | $205 \pm 6$  | $147 \pm 6$  |
|                                      | s                    | 4                     | 10           | 14           | 13           | 5            | 5            |

Table S4. Intermediate precision evaluation of net signal measurements for target samples vs. reference solution ( $n = 150$ ,  $p = 0.95$ ) full data.

| Day 1.                              |                      |              |              |             |
|-------------------------------------|----------------------|--------------|--------------|-------------|
| Analytical Signal of Sensor         | Number of Experiment | Operator 1   | Operator 2   | Operator 3  |
| RAF of Abs to IFNg (liquid samples) |                      |              |              |             |
| $\Delta f$                          | 1                    | 152          | 145          | 161         |
|                                     | 2                    | 154          | 147          | 144         |
|                                     | 3                    | 145          | 154          | 152         |
|                                     | 4                    | 149          | 153          | 162         |
|                                     | 5                    | 141          | 148          | 155         |
|                                     | average $\pm \delta$ | $148 \pm 7$  | $149 \pm 5$  | $155 \pm 9$ |
|                                     | s                    | 5            | 4            | 7           |
| Placebo (liquid samples)            |                      |              |              |             |
| $\Delta f$                          | 1                    | 201          | 198          | 206         |
|                                     | 2                    | 194          | 215          | 200         |
|                                     | 3                    | 204          | 214          | 196         |
|                                     | 4                    | 213          | 196          | 197         |
|                                     | 5                    | 205          | 208          | 205         |
|                                     | average $\pm \delta$ | $203 \pm 9$  | $206 \pm 11$ | $201 \pm 6$ |
|                                     | s                    | 7            | 9            | 5           |
| RAF of Abs to IFNg (tablets)        |                      |              |              |             |
| $\Delta f$                          | 1                    | 122          | 104          | 102         |
|                                     | 2                    | 118          | 109          | 108         |
|                                     | 3                    | 116          | 115          | 111         |
|                                     | 4                    | 101          | 111          | 115         |
|                                     | 5                    | 107          | 121          | 104         |
|                                     | average $\pm \delta$ | $113 \pm 11$ | $112 \pm 8$  | $108 \pm 7$ |
|                                     | s                    | 9            | 6            | 5           |

Table S4. Cont.

| Day 1.                               |                      |             |             |              |
|--------------------------------------|----------------------|-------------|-------------|--------------|
| Analytical Signal of Sensor          | Number of Experiment | Operator 1  | Operator 2  | Operator 3   |
| Placebo (tablets)                    |                      |             |             |              |
| $\Delta f$                           | 1                    | 169         | 156         | 150          |
|                                      | 2                    | 174         | 154         | 159          |
|                                      | 3                    | 181         | 157         | 165          |
|                                      | 4                    | 170         | 169         | 168          |
|                                      | 5                    | 180         | 162         | 171          |
|                                      | average $\pm \delta$ | $175 \pm 7$ | $160 \pm 7$ | $163 \pm 10$ |
| s                                    | 6                    | 6           | 8           |              |
| RAF of Abs to IFNg (lactose powders) |                      |             |             |              |
| $\Delta f$                           | 1                    | 108         | 114         | 113          |
|                                      | 2                    | 104         | 106         | 110          |
|                                      | 3                    | 112         | 104         | 103          |
|                                      | 4                    | 101         | 109         | 114          |
|                                      | 5                    | 109         | 111         | 105          |
|                                      | average $\pm \delta$ | $107 \pm 5$ | $109 \pm 5$ | $109 \pm 6$  |
| s                                    | 4                    | 4           | 5           |              |
| Placebo (lactose powders)            |                      |             |             |              |
| $\Delta f$                           | 1                    | 167         | 161         | 163          |
|                                      | 2                    | 162         | 159         | 167          |
|                                      | 3                    | 163         | 171         | 170          |
|                                      | 4                    | 174         | 165         | 164          |
|                                      | 5                    | 176         | 163         | 160          |
|                                      | average $\pm \delta$ | $168 \pm 8$ | $164 \pm 6$ | $165 \pm 5$  |
| s                                    | 6                    | 5           | 4           |              |
| Day 2.                               |                      |             |             |              |
| Analytical Signal of Sensor          | Number of Experiment | Operator 1  | Operator 2  | Operator 3   |
| RAF Abs to IFNg (liquid samples)     |                      |             |             |              |
| $\Delta f$                           | 1                    | 149         | 151         | 157          |
|                                      | 2                    | 143         | 156         | 159          |
|                                      | 3                    | 152         | 157         | 163          |
|                                      | 4                    | 153         | 149         | 167          |
|                                      | 5                    | 154         | 150         | 155          |
|                                      | average $\pm \delta$ | $150 \pm 6$ | $153 \pm 5$ | $160 \pm 6$  |
| s                                    | 4                    | 4           | 5           |              |
| Placebo (liquid samples)             |                      |             |             |              |
| $\Delta f$                           | 1                    | 203         | 193         | 200          |
|                                      | 2                    | 207         | 197         | 197          |
|                                      | 3                    | 198         | 198         | 193          |
|                                      | 4                    | 205         | 190         | 203          |
|                                      | 5                    | 206         | 197         | 205          |
|                                      | average $\pm \delta$ | $204 \pm 4$ | $195 \pm 4$ | $200 \pm 6$  |
| s                                    | 4                    | 3           | 5           |              |

Table S4. Cont.

| Day 2.                               |                      |             |             |             |
|--------------------------------------|----------------------|-------------|-------------|-------------|
| Analytical Signal of Sensor          | Number of Experiment | Operator 1  | Operator 2  | Operator 3  |
| RAF of Abs to IFNg (tablets)         |                      |             |             |             |
| $\Delta f$                           | 1                    | 125         | 109         | 109         |
|                                      | 2                    | 114         | 115         | 115         |
|                                      | 3                    | 109         | 123         | 123         |
|                                      | 4                    | 118         | 117         | 117         |
|                                      | 5                    | 112         | 120         | 120         |
|                                      | average $\pm \delta$ | $116 \pm 8$ | $117 \pm 7$ | $117 \pm 7$ |
| s                                    | 6                    | 5           | 5           |             |
| Placebo (tablets)                    |                      |             |             |             |
| $\Delta f$                           | 1                    | 172         | 165         | 165         |
|                                      | 2                    | 176         | 158         | 168         |
|                                      | 3                    | 184         | 169         | 151         |
|                                      | 4                    | 165         | 152         | 158         |
|                                      | 5                    | 178         | 160         | 164         |
|                                      | average $\pm \delta$ | $175 \pm 9$ | $161 \pm 8$ | $161 \pm 8$ |
| s                                    | 7                    | 7           | 7           |             |
| RAF of Abs to IFNg (lactose powders) |                      |             |             |             |
| $\Delta f$                           | 1                    | 108         | 110         | 115         |
|                                      | 2                    | 104         | 115         | 108         |
|                                      | 3                    | 112         | 108         | 119         |
|                                      | 4                    | 101         | 107         | 121         |
|                                      | 5                    | 109         | 114         | 108         |
|                                      | average $\pm \delta$ | $107 \pm 5$ | $111 \pm 4$ | $114 \pm 8$ |
| s                                    | 4                    | 4           | 6           |             |
| Placebo (lactose powders)            |                      |             |             |             |
| $\Delta f$                           | 1                    | 169         | 169         | 156         |
|                                      | 2                    | 164         | 172         | 152         |
|                                      | 3                    | 162         | 160         | 165         |
|                                      | 4                    | 170         | 157         | 161         |
|                                      | 5                    | 165         | 155         | 154         |
|                                      | average $\pm \delta$ | $166 \pm 4$ | $163 \pm 9$ | $158 \pm 7$ |
| s                                    | 3                    | 8           | 5           |             |
| Day 3.                               |                      |             |             |             |
| Analytical Signal of Sensor          | Number of Experiment | Operator 1  | Operator 2  | Operator 3  |
| RAF of Abs to IFNg (liquid samples)  |                      |             |             |             |
| $\Delta f$                           | 1                    | 147         | 144         | 143         |
|                                      | 2                    | 154         | 154         | 145         |
|                                      | 3                    | 149         | 147         | 152         |
|                                      | 4                    | 154         | 155         | 150         |
|                                      | 5                    | 156         | 142         | 143         |
|                                      | average $\pm \delta$ | $152 \pm 5$ | $148 \pm 7$ | $147 \pm 5$ |
| s                                    | 4                    | 6           | 4           |             |

Table S4. Cont.

| Day 3.                               |                      |             |             |              |
|--------------------------------------|----------------------|-------------|-------------|--------------|
| Analytical Signal of Sensor          | Number of Experiment | Operator 1  | Operator 2  | Operator 3   |
| Placebo (liquid samples)             |                      |             |             |              |
| $\Delta f$                           | 1                    | 207         | 193         | 204          |
|                                      | 2                    | 200         | 199         | 201          |
|                                      | 3                    | 191         | 210         | 191          |
|                                      | 4                    | 200         | 199         | 206          |
|                                      | 5                    | 192         | 207         | 197          |
|                                      | average $\pm \delta$ | $198 \pm 8$ | $202 \pm 8$ | $200 \pm 7$  |
|                                      | s                    | 7           | 7           | 6            |
| RAF of Abs to IFNg (tablets)         |                      |             |             |              |
| $\Delta f$                           | 1                    | 121         | 120         | 124          |
|                                      | 2                    | 117         | 122         | 114          |
|                                      | 3                    | 109         | 121         | 114          |
|                                      | 4                    | 115         | 109         | 118          |
|                                      | 5                    | 114         | 119         | 111          |
|                                      | average $\pm \delta$ | $115 \pm 5$ | $118 \pm 7$ | $116 \pm 6$  |
|                                      | s                    | 4           | 5           | 5            |
| Placebo (tablets)                    |                      |             |             |              |
| $\Delta f$                           | 1                    | 173         | 175         | 171          |
|                                      | 2                    | 184         | 176         | 183          |
|                                      | 3                    | 182         | 169         | 183          |
|                                      | 4                    | 176         | 169         | 176          |
|                                      | 5                    | 180         | 181         | 176          |
|                                      | average $\pm \delta$ | $179 \pm 6$ | $174 \pm 6$ | $178 \pm 6$  |
|                                      | s                    | 4           | 5           | 5            |
| RAF of Abs to IFNg (lactose powders) |                      |             |             |              |
| $\Delta f$                           | 1                    | 118         | 107         | 100          |
|                                      | 2                    | 103         | 117         | 106          |
|                                      | 3                    | 105         | 118         | 100          |
|                                      | 4                    | 119         | 114         | 118          |
|                                      | 5                    | 109         | 108         | 120          |
|                                      | average $\pm \delta$ | $111 \pm 9$ | $113 \pm 6$ | $109 \pm 12$ |
|                                      | s                    | 7           | 5           | 10           |
| Placebo (lactose powders)            |                      |             |             |              |
| $\Delta f$                           | 1                    | 173         | 155         | 159          |
|                                      | 2                    | 172         | 169         | 169          |
|                                      | 3                    | 169         | 170         | 155          |
|                                      | 4                    | 165         | 168         | 163          |
|                                      | 5                    | 175         | 157         | 157          |
|                                      | average $\pm \delta$ | $171 \pm 5$ | $164 \pm 9$ | $161 \pm 7$  |
|                                      | s                    | 4           | 7           | 6            |

Table S4. Cont.

| Day 4.                               |                      |             |             |             |
|--------------------------------------|----------------------|-------------|-------------|-------------|
| Analytical Signal of Sensor          | Number of Experiment | Operator 1  | Operator 2  | Operator 3  |
| RAF of Abs to IFNg (liquid samples)  |                      |             |             |             |
| $\Delta f$                           | 1                    | 153         | 144         | 144         |
|                                      | 2                    | 145         | 153         | 152         |
|                                      | 3                    | 149         | 155         | 157         |
|                                      | 4                    | 145         | 144         | 146         |
|                                      | 5                    | 149         | 153         | 145         |
|                                      | average $\pm \delta$ | $148 \pm 4$ | $150 \pm 7$ | $149 \pm 7$ |
|                                      | s                    | 3           | 5           | 6           |
| Placebo (liquid samples)             |                      |             |             |             |
| $\Delta f$                           | 1                    | 201         | 196         | 203         |
|                                      | 2                    | 200         | 198         | 193         |
|                                      | 3                    | 202         | 191         | 203         |
|                                      | 4                    | 196         | 202         | 202         |
|                                      | 5                    | 194         | 208         | 195         |
|                                      | average $\pm \delta$ | $199 \pm 4$ | $199 \pm 8$ | $199 \pm 6$ |
|                                      | s                    | 3           | 6           | 5           |
| RAF of Abs to IFNg (tablets)         |                      |             |             |             |
| $\Delta f$                           | 1                    | 113         | 109         | 131         |
|                                      | 2                    | 134         | 107         | 103         |
|                                      | 3                    | 102         | 131         | 123         |
|                                      | 4                    | 111         | 109         | 101         |
|                                      | 5                    | 124         | 111         | 111         |
|                                      | average $\pm \delta$ | $117 \pm 2$ | $113 \pm 1$ | $114 \pm 2$ |
|                                      | s                    | 12          | 10          | 13          |
| Placebo (tablets)                    |                      |             |             |             |
| $\Delta f$                           | 1                    | 168         | 172         | 192         |
|                                      | 2                    | 166         | 174         | 186         |
|                                      | 3                    | 190         | 180         | 186         |
|                                      | 4                    | 175         | 188         | 169         |
|                                      | 5                    | 181         | 174         | 173         |
|                                      | average $\pm \delta$ | $176 \pm 1$ | $178 \pm 8$ | $181 \pm 1$ |
|                                      | s                    | 10          | 7           | 10          |
| RAF of Abs to IFNg (lactose powders) |                      |             |             |             |
| $\Delta f$                           | 1                    | 118         | 115         | 100         |
|                                      | 2                    | 103         | 111         | 106         |
|                                      | 3                    | 105         | 112         | 100         |
|                                      | 4                    | 119         | 112         | 118         |
|                                      | 5                    | 109         | 115         | 120         |
|                                      | average $\pm \delta$ | $111 \pm 7$ | $113 \pm 2$ | $109 \pm 1$ |
|                                      | s                    | 14          | 4           | 10          |



Table S4. Cont.

| Day 4.                              |                      |             |             |              |
|-------------------------------------|----------------------|-------------|-------------|--------------|
| Analytical Signal of Sensor         | Number of Experiment | Operator 1  | Operator 2  | Operator 3   |
| Placebo (lactose powders)           |                      |             |             |              |
| $\Delta f$                          | 1                    | 152         | 175         | 180          |
|                                     | 2                    | 176         | 167         | 156          |
|                                     | 3                    | 175         | 157         | 164          |
|                                     | 4                    | 173         | 171         | 165          |
|                                     | 5                    | 158         | 176         | 175          |
|                                     | average $\pm \delta$ | $167 \pm 1$ | $169 \pm 1$ | $168 \pm 1$  |
|                                     | s                    | 11          | 8           | 10           |
| Day 5.                              |                      |             |             |              |
| Analytical Signal of Sensor         | Number of Experiment | Operator 1  | Operator 2  | Operator 3   |
| RAF of Abs to IFNg (liquid samples) |                      |             |             |              |
| $\Delta f$                          | 1                    | 157         | 143         | 148          |
|                                     | 2                    | 151         | 153         | 156          |
|                                     | 3                    | 151         | 153         | 154          |
|                                     | 4                    | 158         | 150         | 147          |
|                                     | 5                    | 151         | 149         | 142          |
|                                     | average $\pm \delta$ | $154 \pm 4$ | $150 \pm 5$ | $149 \pm 7$  |
|                                     | s                    | 4           | 4           | 6            |
| Placebo (liquid samples)            |                      |             |             |              |
| $\Delta f$                          | 1                    | 196         | 206         | 190          |
|                                     | 2                    | 202         | 200         | 195          |
|                                     | 3                    | 201         | 196         | 202          |
|                                     | 4                    | 206         | 192         | 207          |
|                                     | 5                    | 196         | 203         | 209          |
|                                     | average $\pm \delta$ | $200 \pm 5$ | $199 \pm 7$ | $201 \pm 10$ |
|                                     | s                    | 4           | 6           | 8            |
| RAF of Abs to IFNg (tablets)        |                      |             |             |              |
| $\Delta f$                          | 1                    | 118         | 119         | 110          |
|                                     | 2                    | 109         | 115         | 122          |
|                                     | 3                    | 113         | 106         | 115          |
|                                     | 4                    | 104         | 110         | 111          |
|                                     | 5                    | 120         | 112         | 109          |
|                                     | average $\pm \delta$ | $113 \pm 8$ | $112 \pm 6$ | $113 \pm 7$  |
|                                     | s                    | 7           | 5           | 5            |
| Placebo (tablets)                   |                      |             |             |              |
| $\Delta f$                          | 1                    | 185         | 170         | 177          |
|                                     | 2                    | 182         | 177         | 179          |
|                                     | 3                    | 175         | 169         | 183          |
|                                     | 4                    | 176         | 182         | 174          |
|                                     | 5                    | 184         | 173         | 169          |
|                                     | average $\pm \delta$ | $180 \pm 6$ | $174 \pm 7$ | $176 \pm 7$  |
|                                     | s                    | 5           | 5           | 5            |

Table S4. Cont.

| Day 5.                               |                      |             |             |              |
|--------------------------------------|----------------------|-------------|-------------|--------------|
| Analytical Signal of Sensor          | Number of Experiment | Operator 1  | Operator 2  | Operator 3   |
| RAF of Abs to IFNg (lactose powders) |                      |             |             |              |
| $\Delta f$                           | 1                    | 103         | 118         | 113          |
|                                      | 2                    | 107         | 107         | 109          |
|                                      | 3                    | 111         | 119         | 109          |
|                                      | 4                    | 117         | 118         | 109          |
|                                      | 5                    | 112         | 116         | 116          |
|                                      | average $\pm \delta$ | $110 \pm 7$ | $116 \pm 6$ | $111 \pm 4$  |
|                                      | s                    | 5           | 5           | 3            |
| Placebo (lactose powders)            |                      |             |             |              |
| $\Delta f$                           | 1                    | 171         | 176         | 176          |
|                                      | 2                    | 177         | 173         | 164          |
|                                      | 3                    | 165         | 165         | 157          |
|                                      | 4                    | 173         | 166         | 172          |
|                                      | 5                    | 170         | 162         | 175          |
|                                      | average $\pm \delta$ | $171 \pm 5$ | $168 \pm 7$ | $169 \pm 10$ |
|                                      | s                    | 4           | 6           | 8            |
| Day 6.                               |                      |             |             |              |
| Analytical Signal of Sensor          | Number of Experiment | Operator 1  | Operator 2  | Operator 3   |
| RAF of Abs to IFNg (liquid samples)  |                      |             |             |              |
| $\Delta f$                           | 1                    | 161         | 145         | 151          |
|                                      | 2                    | 149         | 147         | 153          |
|                                      | 3                    | 152         | 162         | 161          |
|                                      | 4                    | 161         | 162         | 146          |
|                                      | 5                    | 148         | 161         | 154          |
|                                      | average $\pm \delta$ | $154 \pm 8$ | $155 \pm 1$ | $153 \pm 7$  |
|                                      | s                    | 6           | 9           | 5            |
| Placebo (liquid samples)             |                      |             |             |              |
| $\Delta f$                           | 1                    | 212         | 200         | 193          |
|                                      | 2                    | 201         | 204         | 206          |
|                                      | 3                    | 203         | 197         | 204          |
|                                      | 4                    | 196         | 206         | 198          |
|                                      | 5                    | 202         | 204         | 205          |
|                                      | average $\pm \delta$ | $203 \pm 7$ | $202 \pm 5$ | $201 \pm 7$  |
|                                      | s                    | 6           | 4           | 6            |
| RAF of Abs to IFNg (tablets)         |                      |             |             |              |
| $\Delta f$                           | 1                    | 118         | 113         | 106          |
|                                      | 2                    | 111         | 107         | 109          |
|                                      | 3                    | 121         | 119         | 112          |
|                                      | 4                    | 115         | 110         | 120          |
|                                      | 5                    | 110         | 113         | 124          |
|                                      | average $\pm \delta$ | $115 \pm 6$ | $112 \pm 6$ | $114 \pm 9$  |
|                                      | s                    | 5           | 4           | 8            |

Table S4. Cont.

| Day 6.                               |                      |             |             |             |
|--------------------------------------|----------------------|-------------|-------------|-------------|
| Analytical Signal of Sensor          | Number of Experiment | Operator 1  | Operator 2  | Operator 3  |
| Placebo (tablets)                    |                      |             |             |             |
| $\Delta f$                           | 1                    | 179         | 184         | 179         |
|                                      | 2                    | 185         | 177         | 178         |
|                                      | 3                    | 169         | 179         | 169         |
|                                      | 4                    | 176         | 178         | 184         |
|                                      | 5                    | 176         | 170         | 172         |
|                                      | average $\pm \delta$ | $177 \pm 7$ | $178 \pm 6$ | $176 \pm 7$ |
|                                      | s                    | 6           | 5           | 6           |
| RAF of Abs to IFNg (lactose powders) |                      |             |             |             |
| $\Delta f$                           | 1                    | 118         | 108         | 104         |
|                                      | 2                    | 118         | 117         | 122         |
|                                      | 3                    | 123         | 118         | 104         |
|                                      | 4                    | 105         | 113         | 121         |
|                                      | 5                    | 121         | 103         | 116         |
|                                      | average $\pm \delta$ | $117 \pm 9$ | $112 \pm 8$ | $113 \pm 1$ |
|                                      | s                    | 7           | 6           | 9           |
| Placebo (lactose powders)            |                      |             |             |             |
| $\Delta f$                           | 1                    | 175         | 179         | 161         |
|                                      | 2                    | 169         | 174         | 171         |
|                                      | 3                    | 172         | 164         | 178         |
|                                      | 4                    | 168         | 165         | 171         |
|                                      | 5                    | 177         | 164         | 178         |
|                                      | average $\pm \delta$ | $172 \pm 5$ | $169 \pm 9$ | $172 \pm 9$ |
|                                      | s                    | 4           | 7           | 7           |
| Day 7.                               |                      |             |             |             |
| Analytical Signal of Sensor          | Number of Experiment | Operator 1  | Operator 2  | Operator 3  |
| RAF of Abs to IFNg (liquid samples)  |                      |             |             |             |
| $\Delta f$                           | 1                    | 166         | 153         | 149         |
|                                      | 2                    | 168         | 150         | 158         |
|                                      | 3                    | 158         | 166         | 169         |
|                                      | 4                    | 152         | 165         | 166         |
|                                      | 5                    | 152         | 151         | 157         |
|                                      | average $\pm \delta$ | $159 \pm 9$ | $157 \pm 1$ | $160 \pm 1$ |
|                                      | s                    | 8           | 8           | 8           |
| Placebo (liquid samples)             |                      |             |             |             |
| $\Delta f$                           | 1                    | 207         | 201         | 211         |
|                                      | 2                    | 195         | 204         | 215         |
|                                      | 3                    | 209         | 201         | 218         |
|                                      | 4                    | 214         | 199         | 198         |
|                                      | 5                    | 202         | 198         | 214         |
|                                      | average $\pm \delta$ | $205 \pm 9$ | $201 \pm 3$ | $211 \pm 1$ |
|                                      | s                    | 7           | 2           | 8           |

Table 4. Cont.

| Day 7.                               |                      |             |             |             |
|--------------------------------------|----------------------|-------------|-------------|-------------|
| Analytical Signal of Sensor          | Number of Experiment | Operator 1  | Operator 2  | Operator 3  |
| RAF of Abs to IFNg (tablets)         |                      |             |             |             |
| $\Delta f$                           | 1                    | 107         | 109         | 114         |
|                                      | 2                    | 119         | 124         | 124         |
|                                      | 3                    | 114         | 124         | 105         |
|                                      | 4                    | 120         | 126         | 119         |
|                                      | 5                    | 106         | 114         | 121         |
|                                      | average $\pm \delta$ | 113 $\pm$ 8 | 119 $\pm$ 9 | 117 $\pm$ 9 |
|                                      | s                    | 7           | 7           | 7           |
| Placebo (tablets)                    |                      |             |             |             |
| $\Delta f$                           | 1                    | 184         | 169         | 168         |
|                                      | 2                    | 179         | 167         | 188         |
|                                      | 3                    | 180         | 165         | 174         |
|                                      | 4                    | 174         | 165         | 182         |
|                                      | 5                    | 167         | 188         | 169         |
|                                      | average $\pm \delta$ | 177 $\pm$ 8 | 171 $\pm$ 1 | 176 $\pm$ 1 |
|                                      | s                    | 7           | 10          | 9           |
| RAF of Abs to IFNg (lactose powders) |                      |             |             |             |
| $\Delta f$                           | 1                    | 121         | 102         | 117         |
|                                      | 2                    | 120         | 102         | 103         |
|                                      | 3                    | 111         | 106         | 102         |
|                                      | 4                    | 120         | 119         | 106         |
|                                      | 5                    | 101         | 114         | 110         |
|                                      | average $\pm \delta$ | 115 $\pm$ 9 | 109 $\pm$ 8 | 108 $\pm$ 8 |
|                                      | s                    | 11          | 9           | 8           |
| Placebo (lactose powders)            |                      |             |             |             |
| $\Delta f$                           | 1                    | 178         | 182         | 166         |
|                                      | 2                    | 166         | 169         | 175         |
|                                      | 3                    | 180         | 161         | 167         |
|                                      | 4                    | 169         | 167         | 160         |
|                                      | 5                    | 173         | 180         | 181         |
|                                      | average $\pm \delta$ | 173 $\pm$ 7 | 172 $\pm$ 1 | 170 $\pm$ 1 |
|                                      | s                    | 6           | 9           | 8           |
| Day 8.                               |                      |             |             |             |
| Analytical Signal of Sensor          | Number of Experiment | Operator 1  | Operator 2  | Operator 3  |
| RAF of Abs to IFNg (liquid samples)  |                      |             |             |             |
| $\Delta f$                           | 1                    | 172         | 158         | 157         |
|                                      | 2                    | 157         | 157         | 168         |
|                                      | 3                    | 171         | 149         | 165         |
|                                      | 4                    | 166         | 163         | 156         |
|                                      | 5                    | 158         | 169         | 156         |
|                                      | average $\pm \delta$ | 165 $\pm$ 9 | 159 $\pm$ 9 | 160 $\pm$ 7 |
|                                      | s                    | 7           | 7           | 6           |

Table S4. Cont.

| Day 8.                               |                      |             |             |             |
|--------------------------------------|----------------------|-------------|-------------|-------------|
| Analytical Signal of Sensor          | Number of Experiment | Operator 1  | Operator 2  | Operator 3  |
| Placebo (liquid samples)             |                      |             |             |             |
| $\Delta f$                           | 1                    | 201         | 191         | 211         |
|                                      | 2                    | 195         | 207         | 212         |
|                                      | 3                    | 203         | 202         | 214         |
|                                      | 4                    | 202         | 196         | 203         |
|                                      | 5                    | 208         | 215         | 210         |
|                                      | average $\pm \delta$ | $202 \pm 6$ | $202 \pm 1$ | $210 \pm 5$ |
|                                      | s                    | 5           | 9           | 4           |
| RAF of Abs to IFNg (tablets)         |                      |             |             |             |
| $\Delta f$                           | 1                    | 114         | 123         | 118         |
|                                      | 2                    | 118         | 115         | 107         |
|                                      | 3                    | 122         | 118         | 113         |
|                                      | 4                    | 123         | 113         | 104         |
|                                      | 5                    | 110         | 106         | 124         |
|                                      | average $\pm \delta$ | $117 \pm 7$ | $115 \pm 8$ | $113 \pm 1$ |
|                                      | s                    | 5           | 6           | 8           |
| Placebo (tablets)                    |                      |             |             |             |
| $\Delta f$                           | 1                    | 181         | 173         | 180         |
|                                      | 2                    | 169         | 179         | 174         |
|                                      | 3                    | 171         | 178         | 176         |
|                                      | 4                    | 172         | 169         | 182         |
|                                      | 5                    | 176         | 176         | 178         |
|                                      | average $\pm \delta$ | $174 \pm 6$ | $175 \pm 5$ | $178 \pm 4$ |
|                                      | s                    | 5           | 4           | 3           |
| RAF of Abs to IFNg (lactose powders) |                      |             |             |             |
| $\Delta f$                           | 1                    | 106         | 104         | 107         |
|                                      | 2                    | 116         | 116         | 105         |
|                                      | 3                    | 101         | 118         | 119         |
|                                      | 4                    | 103         | 102         | 103         |
|                                      | 5                    | 120         | 116         | 112         |
|                                      | average $\pm \delta$ | $109 \pm 1$ | $111 \pm 9$ | $109 \pm 8$ |
|                                      | s                    | 8           | 8           | 6           |
| Placebo (lactose powders)            |                      |             |             |             |
| $\Delta f$                           | 1                    | 173         | 178         | 171         |
|                                      | 2                    | 179         | 177         | 164         |
|                                      | 3                    | 175         | 180         | 180         |
|                                      | 4                    | 166         | 179         | 170         |
|                                      | 5                    | 163         | 178         | 174         |
|                                      | average $\pm \delta$ | $171 \pm 8$ | $178 \pm 1$ | $172 \pm 7$ |
|                                      | s                    | 7           | 1           | 6           |

Table S4. Cont.

| Day 9.                               |                      |             |              |              |
|--------------------------------------|----------------------|-------------|--------------|--------------|
| Analytical Signal of Sensor          | Number of Experiment | Operator 1  | Operator 2   | Operator 3   |
| RAF of Abs to IFNg (liquid samples)  |                      |             |              |              |
| $\Delta f$                           | 1                    | 167         | 153          | 173          |
|                                      | 2                    | 170         | 154          | 153          |
|                                      | 3                    | 158         | 175          | 161          |
|                                      | 4                    | 165         | 166          | 152          |
|                                      | 5                    | 160         | 166          | 154          |
|                                      | average $\pm \delta$ | $164 \pm 6$ | $163 \pm 11$ | $159 \pm 11$ |
|                                      | s                    | 5           | 9            | 9            |
| Placebo (liquid samples)             |                      |             |              |              |
| $\Delta f$                           | 1                    | 190         | 199          | 200          |
|                                      | 2                    | 203         | 207          | 192          |
|                                      | 3                    | 203         | 188          | 193          |
|                                      | 4                    | 205         | 199          | 210          |
|                                      | 5                    | 209         | 194          | 193          |
|                                      | average $\pm \delta$ | $202 \pm 9$ | $197 \pm 9$  | $198 \pm 9$  |
|                                      | s                    | 7           | 7            | 8            |
| RAF of Abs to IFNg (tablets)         |                      |             |              |              |
| $\Delta f$                           | 1                    | 124         | 121          | 129          |
|                                      | 2                    | 111         | 124          | 121          |
|                                      | 3                    | 116         | 124          | 115          |
|                                      | 4                    | 114         | 115          | 129          |
|                                      | 5                    | 107         | 121          | 108          |
|                                      | average $\pm \delta$ | $114 \pm 8$ | $121 \pm 5$  | $120 \pm 1$  |
|                                      | s                    | 6           | 4            | 9            |
| Placebo (tablets)                    |                      |             |              |              |
| $\Delta f$                           | 1                    | 163         | 170          | 171          |
|                                      | 2                    | 171         | 180          | 176          |
|                                      | 3                    | 173         | 162          | 179          |
|                                      | 4                    | 174         | 174          | 182          |
|                                      | 5                    | 182         | 162          | 178          |
|                                      | average $\pm \delta$ | $173 \pm 8$ | $170 \pm 1$  | $177 \pm 5$  |
|                                      | s                    | 7           | 8            | 4            |
| RAF of Abs to IFNg (lactose powders) |                      |             |              |              |
| $\Delta f$                           | 1                    | 104         | 109          | 113          |
|                                      | 2                    | 119         | 123          | 106          |
|                                      | 3                    | 111         | 113          | 127          |
|                                      | 4                    | 114         | 125          | 107          |
|                                      | 5                    | 122         | 107          | 115          |
|                                      | average $\pm \delta$ | $114 \pm 9$ | $115 \pm 1$  | $114 \pm 1$  |
|                                      | s                    | 7           | 8            | 8            |

Table S4. Cont.

| Day 9.                              |                      |             |             |             |
|-------------------------------------|----------------------|-------------|-------------|-------------|
| Analytical Signal of Sensor         | Number of Experiment | Operator 1  | Operator 2  | Operator 3  |
| Placebo (lactose powders)           |                      |             |             |             |
| $\Delta f$                          | 1                    | 172         | 172         | 175         |
|                                     | 2                    | 179         | 166         | 170         |
|                                     | 3                    | 186         | 170         | 165         |
|                                     | 4                    | 186         | 186         | 185         |
|                                     | 5                    | 172         | 179         | 165         |
|                                     | average $\pm \delta$ | $179 \pm 9$ | $175 \pm 1$ | $172 \pm 1$ |
|                                     | s                    | 7           | 8           | 8           |
| Day 10.                             |                      |             |             |             |
| Analytical Signal of Sensor         | Number of Experiment | Operator 1  | Operator 2  | Operator 3  |
| RAF of Abs to IFNg (liquid samples) |                      |             |             |             |
| $\Delta f$                          | 1                    | 158         | 165         | 160         |
|                                     | 2                    | 172         | 160         | 163         |
|                                     | 3                    | 162         | 166         | 155         |
|                                     | 4                    | 166         | 173         | 161         |
|                                     | 5                    | 160         | 160         | 164         |
|                                     | average $\pm \delta$ | $164 \pm 7$ | $165 \pm 7$ | $161 \pm 4$ |
|                                     | s                    | 6           | 5           | 4           |
| Placebo (liquid samples)            |                      |             |             |             |
| $\Delta f$                          | 1                    | 204         | 210         | 195         |
|                                     | 2                    | 189         | 207         | 200         |
|                                     | 3                    | 195         | 212         | 196         |
|                                     | 4                    | 202         | 197         | 209         |
|                                     | 5                    | 208         | 199         | 197         |
|                                     | average $\pm \delta$ | $200 \pm 9$ | $205 \pm 8$ | $199 \pm 7$ |
|                                     | s                    | 8           | 7           | 6           |
| RAF of Abs to IFNg (tablets)        |                      |             |             |             |
| $\Delta f$                          | 1                    | 115         | 129         | 107         |
|                                     | 2                    | 115         | 113         | 130         |
|                                     | 3                    | 124         | 108         | 109         |
|                                     | 4                    | 112         | 126         | 111         |
|                                     | 5                    | 111         | 120         | 114         |
|                                     | average $\pm \delta$ | $115 \pm 6$ | $119 \pm 1$ | $114 \pm 1$ |
|                                     | s                    | 5           | 9           | 9           |
| Placebo (tablets)                   |                      |             |             |             |
| $\Delta f$                          | 1                    | 167         | 182         | 168         |
|                                     | 2                    | 169         | 183         | 187         |
|                                     | 3                    | 187         | 166         | 166         |
|                                     | 4                    | 171         | 167         | 181         |
|                                     | 5                    | 166         | 171         | 182         |
|                                     | average $\pm \delta$ | $172 \pm 1$ | $174 \pm 1$ | $177 \pm 1$ |
|                                     | s                    | 9           | 8           | 9           |

Table S4. Cont.

| Day 10.                              |                      |              |             |             |
|--------------------------------------|----------------------|--------------|-------------|-------------|
| Analytical Signal of Sensor          | Number of Experiment | Operator 1   | Operator 2  | Operator 3  |
| RAF of Abs to IFNg (lactose powders) |                      |              |             |             |
| $\Delta f$                           | 1                    | 120          | 110         | 111         |
|                                      | 2                    | 117          | 116         | 119         |
|                                      | 3                    | 102          | 103         | 122         |
|                                      | 4                    | 113          | 102         | 116         |
|                                      | 5                    | 112          | 115         | 115         |
|                                      | average $\pm \delta$ | $113 \pm 8$  | $109 \pm 8$ | $117 \pm 5$ |
|                                      | s                    | 7            | 7           | 4           |
| Placebo (lactose powders)            |                      |              |             |             |
| $\Delta f$                           | 1                    | 167          | 177         | 169         |
|                                      | 2                    | 164          | 171         | 166         |
|                                      | 3                    | 183          | 171         | 176         |
|                                      | 4                    | 186          | 181         | 186         |
|                                      | 5                    | 175          | 178         | 168         |
|                                      | average $\pm \delta$ | $175 \pm 12$ | $176 \pm 6$ | $173 \pm 1$ |
|                                      | s                    | 10           | 4           | 8           |
